# Supplementary material
Source: PubMed Central journal article supplement (PMC5541205)
Supplement: AEM.01074-17_zam999118000s1.pdf [file AEM.01074-17_zam999118000s1.pdf]

## **Supplemental material**

### **Natural DNA transformation is functional in *Lactococcus lactis* ssp. *cremoris* KW2**

Blandine David, Amandine Radziejwoski, Frédéric Toussaint, Laetitia Fontaine, Marie Henry de Frahan, Cédric Patout, Sabine van Dillen, Patrick Boyaval, Philippe Horvath, Christophe Fremaux, Pascal Hols

**TABLE S1.** Late *com* genes in the complete genomes of *L. lactis* ssp. *cremoris*.

**TABLE S2.** Up-regulated genes in the ComX<sup>+</sup> strain (BLD101 [pGIBLD001]) compared to Ctl<sup>-</sup> (BLD101 [pG<sup>+</sup>host9]).

**TABLE S3.** Predicted Com-box in intergenic regions of the genome of KW2.

**FIGURE S1.** Protein and nucleotide mutations of a selected spontaneous Str<sup>r</sup> mutant of MG1363.

**FIGURE S2.** Stabilization of the activation of the late promoter P<sub>comGA</sub> by inducible *comX* expression.

**TABLE S1.** Late *com* genes in the complete genomes of *L. lactis* ssp. *cremoris*.

| Gene         | KW2                  |                          |           | MG1363               |                          |                                | A76                  |                                         |                                | SK11                 |                          |                                | UC509.9              |                          |                                |
|--------------|----------------------|--------------------------|-----------|----------------------|--------------------------|--------------------------------|----------------------|-----------------------------------------|--------------------------------|----------------------|--------------------------|--------------------------------|----------------------|--------------------------|--------------------------------|
|              | Sta-tus <sup>a</sup> | accession number         | size (aa) | Sta-tus <sup>a</sup> | accession number         | size (aa)/id. (%) <sup>b</sup> | Sta-tus <sup>a</sup> | accession number                        | size (aa)/id. (%) <sup>b</sup> | Sta-tus <sup>a</sup> | accession number         | size (aa)/id. (%) <sup>b</sup> | Sta-tus <sup>a</sup> | accession number         | size (aa)/id. (%) <sup>b</sup> |
| <i>comX</i>  | +                    | <a href="#">AGV74143</a> | 163       | +                    | <a href="#">CAL98991</a> | 163/99                         | +                    | <a href="#">AEU41666</a>                | 163/98                         | +                    | <a href="#">ABJ73891</a> | 116/96                         | +                    | <a href="#">AFW92540</a> | 163/99                         |
| <i>comGA</i> | +                    | <a href="#">AGV74123</a> | 326       | +                    | <a href="#">CAL98972</a> | 326/100                        | Tn                   | <a href="#">AEU41642</a>                | 180/99                         | Tn                   | NA <sup>e</sup>          | 295/99                         | +                    | <a href="#">AFW92525</a> | 326/99                         |
| <i>comGB</i> | +                    | <a href="#">AGV74122</a> | 314       | +                    | <a href="#">CAL98971</a> | 362 <sup>c</sup> /100          | +                    | <a href="#">AEU41641</a>                | 310 <sup>d</sup> /98           | *                    | NA                       |                                | +                    | <a href="#">AFW92524</a> | 310 <sup>d</sup> /98           |
| <i>comGC</i> | +                    | <a href="#">AGV74121</a> | 125       | +                    | <a href="#">CAL98970</a> | 125/98                         | +                    | <a href="#">AEU41640</a>                | 125/98                         | +                    | <a href="#">ABJ73870</a> | 125/98                         | +                    | <a href="#">AFW92523</a> | 125/98                         |
| <i>comGD</i> | +                    | <a href="#">AGV74120</a> | 132       | +                    | <a href="#">CAL98969</a> | 147 <sup>c</sup> /98           | *                    | <a href="#">AEU41639 &amp; AEU41638</a> | 55/97 & 62/94                  | *                    | NA                       |                                | *                    | NA                       |                                |
| <i>comGE</i> | +                    | <a href="#">AGV74119</a> | 98        | +                    | <a href="#">CAL98968</a> | 128 <sup>c</sup> /100          | +                    | <a href="#">AEU41637</a>                | 78 <sup>d</sup> /96            | +                    | <a href="#">ABJ73869</a> | 98/94                          | +                    | <a href="#">AFW92522</a> | 128 <sup>c</sup> /96           |
| <i>comGF</i> | +                    | <a href="#">AGV74118</a> | 141       | +                    | <a href="#">CAL98967</a> | 148 <sup>c</sup> /100          | +                    | <a href="#">AEU41636</a>                | 86 <sup>d</sup> /100           | +                    | <a href="#">ABJ73868</a> | 141/99                         | +                    | <a href="#">AFW92521</a> | 148 <sup>c</sup> /99           |
| <i>comGG</i> | +                    | <a href="#">AGV74117</a> | 99        | +                    | <a href="#">CAL98966</a> | 99/98                          | +                    | <a href="#">AEU41635</a>                | 81/98                          | +                    | <a href="#">ABJ73867</a> | 99/98                          | +                    | NA <sup>c</sup>          | 99/98                          |
| <i>comC</i>  | +                    | <a href="#">AGV74021</a> | 221       | +                    | <a href="#">CAL98868</a> | 221/99                         | +                    | <a href="#">AEU41516</a>                | 221/99                         | *                    | <a href="#">ABJ73767</a> | 195/98                         | *                    | <a href="#">AFW92429</a> | 195/98                         |
| <i>comFA</i> | +                    | <a href="#">AGV72992</a> | 430       | +                    | <a href="#">CAL98061</a> | 430/98                         | *                    | <a href="#">AEU40370 &amp; AEU40371</a> | 163/99 & 261/97                | *                    | NA                       |                                | *                    | NA                       |                                |
| <i>comFC</i> | +                    | <a href="#">AGV72991</a> | 216       | +                    | <a href="#">CAL98062</a> | 216/98                         | *                    | <a href="#">AEU40369</a>                | 124/98                         | +                    | <a href="#">ABJ72723</a> | 216/98                         | +                    | <a href="#">AFW91637</a> | 216/97                         |
| <i>comEA</i> | +                    | <a href="#">AGV73706</a> | 218       | +                    | <a href="#">CAL98523</a> | 204 <sup>d</sup> /98           | *                    | <a href="#">AEU39881 &amp; AEU39882</a> | 38/90 & 193/93                 | *                    | <a href="#">ABJ73427</a> | 200/91                         | *                    | <a href="#">AFW92184</a> | 200/89                         |
| <i>comEC</i> | +                    | <a href="#">AGV73705</a> | 736       | *                    | NA                       |                                | Tn                   | <a href="#">AEU39883 &amp; AEU39887</a> | 395/97 & 75/97                 | Tn                   | NA                       | 466/97                         | Tn                   | <a href="#">AEU39887</a> | 75/97                          |
| <i>ssbB</i>  | +                    | <a href="#">AGV72374</a> | 129       | +                    | <a href="#">CAL97013</a> | 129/99                         | +                    | <a href="#">AEU39634</a>                | 129/97                         | +                    | <a href="#">ABJ72042</a> | 129/97                         | +                    | <a href="#">AFW91073</a> | 129/95                         |
| <i>coiA</i>  | +                    | <a href="#">AGV73660</a> | 327       | *                    | NA                       |                                | +                    | <a href="#">AEU39940</a>                | 327/97                         | +                    | <a href="#">ABJ73377</a> | 327/97                         | +                    | <a href="#">AFW92139</a> | 327/97                         |
| <i>dprA</i>  | +                    | <a href="#">AGV73150</a> | 282       | +                    | <a href="#">CAL97866</a> | 282/98                         | +                    | <a href="#">AEU40490</a>                | 282/97                         | +                    | <a href="#">ABJ72831</a> | 282/98                         | +                    | <a href="#">AFW91767</a> | 282/98                         |
| <i>RecA</i>  | +                    | <a href="#">AGV72340</a> | 387       | +                    | <a href="#">CAL96979</a> | 387/100                        | +                    | <a href="#">AEU39591</a>                | 387/100                        | +                    | <a href="#">ABJ72007</a> | 387/100                        | +                    | <a href="#">AFW91039</a> | 387/100                        |

<sup>a</sup> +, presence of a complete gene; \* gene incomplete due to nucleotide(s) exchange, insertion or deletion; Tn, gene disrupted by the insertion of at least one transposon.

<sup>b</sup> Percentage of identity (id.) with proteins of strain KW2.

<sup>c</sup> Start codon annotated upstream.

<sup>d</sup> Start codon annotated downstream.

<sup>e</sup> NA, non-annotated, protein was manually identified.

TABLE S2. Up-regulated genes in the ComX<sup>+</sup> strain (BLD101 [pGIBLD001]) compared to Ctl<sup>-</sup> (BLD101 [pG<sup>+</sup>host9]).

| Locus tag                           | Gene         | Description                                 | FC <sup>a</sup> | Essential late <i>com</i> <sup>b</sup> | Com-box <sup>c</sup> |
|-------------------------------------|--------------|---------------------------------------------|-----------------|----------------------------------------|----------------------|
| <b><i>comX</i></b>                  |              |                                             |                 |                                        |                      |
| kw2_2209                            | <i>comX</i>  | competence regulator ComX                   | 19.8            | Y                                      |                      |
| <b>Com-box-associated late loci</b> |              |                                             |                 |                                        |                      |
| <b><i>Locus I</i></b>               |              |                                             |                 |                                        |                      |
| kw2_0357                            | <i>recA</i>  | recombination protein A RecA                | 2.8             | Y                                      | Y                    |
| <b><i>Locus II</i></b>              |              |                                             |                 |                                        |                      |
| kw2_0391                            | <i>ssbB</i>  | single-strand binding protein SsbB          | 23.9            | Y                                      | Y                    |
| kw2_0392                            | <i>groES</i> | chaperonin GroES                            | 4.8             |                                        |                      |
| kw2_0393                            | <i>groEL</i> | chaperonin GroEL                            | 3.6             |                                        |                      |
| <b><i>Locus III</i></b>             |              |                                             |                 |                                        |                      |
| kw2_1003                            | <i>radC</i>  | DNA repair protein RadC                     | 3.0             |                                        | Y                    |
| kw2_1004                            | <i>rex</i>   | redox-sensing transcriptional repressor Rex | 2.8             |                                        |                      |
| kw2_1005                            | <i>arsC</i>  | ArsC family protein                         | 2.5             |                                        |                      |
| <b><i>Locus IV</i></b>              |              |                                             |                 |                                        |                      |
| kw2_1028                            |              | PhoH family protein                         | 2.8             |                                        |                      |
| kw2_1029                            |              | MutT/NUDIX family protein                   | 1.6             |                                        |                      |
| kw2_1031                            |              | diacylglycerol kinase                       | 2.2             |                                        |                      |
| kw2_1032                            |              | hypothetical protein                        | 1.7             |                                        |                      |
| kw2_1033                            | <i>comFC</i> | competence protein FC                       | 1.7             | Y                                      |                      |
| kw2_1034                            | <i>comFA</i> | competence protein FA                       | 1.9             | Y                                      | Y                    |
| <b><i>Locus V</i></b>               |              |                                             |                 |                                        |                      |
| kw2_1192                            | <i>dprA</i>  | DNA protecting protein DprA                 | 6.2             | Y                                      | Y                    |
| kw2_1193                            | <i>topA</i>  | DNA topoisomerase I TopA                    | 2.3             |                                        |                      |
| <b><i>Locus VI</i></b>              |              |                                             |                 |                                        |                      |
| kw2_1576                            | <i>ffh</i>   | signal recognition particle protein Ffh     | 3.7             |                                        |                      |
| kw2_1577                            |              | cell surface protein                        | 3.4             |                                        | Y                    |
| <b><i>Locus VII</i></b>             |              |                                             |                 |                                        |                      |
| kw2_1701                            | <i>alaS</i>  | alanyl-tRNA synthetase AlaS                 | 1.6             |                                        |                      |
| kw2_1702                            | <i>prsA</i>  | peptidyl-prolyl cis-trans isomerase         | 2.5             |                                        |                      |
| kw2_1703                            |              | O-methyltransferase family protein          | 3.4             |                                        |                      |
| kw2_1704                            | <i>pepF</i>  | oligoendopeptidase F PepF                   | 3.8             |                                        |                      |
| kw2_1705                            | <i>coiA</i>  | competence protein CoiA-like family         | 3.9             | Y                                      | Y                    |
| <b><i>Locus VIII</i></b>            |              |                                             |                 |                                        |                      |
| kw2_1750                            | <i>comEC</i> | competence protein ComEC                    | 3.1             | Y                                      |                      |
| kw2_1751                            | <i>comEA</i> | competence protein ComEA                    | 3.1             | Y                                      | Y                    |
| <b><i>Locus IX</i></b>              |              |                                             |                 |                                        |                      |

|                                                           |              |                                                               |      |   |   |
|-----------------------------------------------------------|--------------|---------------------------------------------------------------|------|---|---|
| kw2_2122                                                  | <i>radA</i>  | DNA repair protein RadA                                       | 11.9 |   | Y |
| <b>Locus X</b>                                            |              |                                                               |      |   |   |
| kw2_2177                                                  | <i>acdA</i>  | zinc ABC transporter substrate-binding protein                | 2.0  |   |   |
| kw2_2178                                                  | <i>zitR</i>  | zinc transport transcription regulator                        | 1.8  |   |   |
| kw2_2179                                                  | <i>comGG</i> | competence protein ComGG                                      | 1.9  | Y |   |
| kw2_2180                                                  | <i>comGF</i> | competence protein ComGF                                      | 16.2 |   |   |
| kw2_2181                                                  | <i>comGE</i> | competence protein ComGE                                      | 6.9  |   |   |
| kw2_2182                                                  | <i>comGD</i> | competence protein ComGD                                      | 9.0  | Y |   |
| kw2_2183                                                  | <i>comGC</i> | competence protein ComGC                                      | 7.3  | Y |   |
| kw2_2184                                                  | <i>comGB</i> | competence protein ComGB                                      | 3.1  | Y |   |
| kw2_2185                                                  | <i>comGA</i> | competence protein ComGA                                      | 3.3  | Y | Y |
| <b>Locus XI</b>                                           |              |                                                               |      |   |   |
| kw2_2244                                                  | <i>recX</i>  | recombination regulator RecX                                  | 1.9  |   | Y |
| <b>Competence associated genes</b>                        |              |                                                               |      |   |   |
| kw2_1065                                                  | <i>tag</i>   | DNA-3-methyladenine glycosylase Tag                           | 2.3  |   |   |
| kw2_1849                                                  | <i>mecA</i>  | MecA family protein                                           | 2.4  |   |   |
| kw2_0930                                                  |              | NlpC/P60 family protein                                       | 2.4  |   |   |
| kw2_0555                                                  |              | lytic murein transglycosylase                                 | 2.5  |   |   |
| kw2_1629                                                  |              | transglycosylase-like domain-containing protein               | 2.9  |   |   |
| <b>Stress response and detoxication</b>                   |              |                                                               |      |   |   |
| kw2_0055                                                  |              | OsmC family protein                                           | 2.3  |   |   |
| kw2_1396                                                  |              | glycine betaine/L-proline ABC transporter ATP-binding protein | 2.4  |   |   |
| kw2_0182                                                  | <i>msrB</i>  | methionine sulfoxide reductase B MsrB                         | 2.5  |   |   |
| kw2_1287                                                  |              | ArsD family protein                                           | 2.7  |   |   |
| kw2_1288                                                  |              | ArsC family protein                                           | 2.6  |   |   |
| kw2_1322                                                  |              | toxic anion resistance protein                                | 2.9  |   |   |
| kw2_1323                                                  |              | 5-bromo-4-chloroindolyl phosphate hydrolysis protein          | 3.3  |   |   |
| kw2_1322                                                  |              | toxic anion resistance protein                                | 2.9  |   |   |
| kw2_0306                                                  |              | AhpC/TSA family protein                                       | 2.4  |   |   |
| kw2_0340                                                  | <i>ahpC</i>  | peroxiredoxin AhpC                                            | 2.6  |   |   |
| kw2_0388                                                  |              | thioredoxin family protein                                    | 2.3  |   |   |
| kw2_0410                                                  |              | superoxide dismutase                                          | 2.7  |   |   |
| <b>Amino-acid metabolism</b>                              |              |                                                               |      |   |   |
| kw2_2266                                                  | <i>glnA</i>  | glutamine synthetase type I GlnA                              | 2.3  |   |   |
| kw2_0565                                                  |              | methionine aminopeptidase                                     | 2.4  |   |   |
| <b>Purine/pyrimidine biosynthesis and interconversion</b> |              |                                                               |      |   |   |
| kw2_2006                                                  | <i>purA</i>  | adenylosuccinate synthase PurA                                | 3.1  |   |   |

|          |             |                                                                    |     |
|----------|-------------|--------------------------------------------------------------------|-----|
| kw2_1464 | <i>purE</i> | phosphoribosylaminoimidazole<br>carboxylase catalytic subunit PurE | 2.6 |
| kw2_1476 | <i>purM</i> | phosphoribosylformylglycinamide<br>cyclo-ligase PurM               | 2.4 |
| kw2_1091 | <i>guaC</i> | guanosine monophosphate reductase<br>GuaC                          | 3.0 |

### Transcriptional regulation

|          |  |                                            |     |
|----------|--|--------------------------------------------|-----|
| kw2_1424 |  | transcriptional regulator MarR family      | 2.3 |
| kw2_2267 |  | transcriptional regulator MerR family      | 2.3 |
| kw2_0564 |  | transcriptional regulator TetR family      | 2.7 |
| kw2_1642 |  | two component system response<br>regulator | 2.6 |

### Translation

|          |             |                                         |     |
|----------|-------------|-----------------------------------------|-----|
| kw2_1900 | <i>infC</i> | translation initiation factor IF-3 InfC | 2.3 |
| kw2_0782 | <i>rpsA</i> | ribosomal protein S1 RpsA               | 2.3 |
| kw2_2212 | <i>rpsB</i> | ribosomal protein S2 RpsB               | 2.4 |
| kw2_1716 | <i>rpsT</i> | ribosomal protein S20 RpsT              | 2.4 |
| kw2_2056 | <i>rplA</i> | ribosomal protein L1 RplA               | 2.3 |
| kw2_2158 | <i>rplB</i> | ribosomal protein L2 RplB               | 2.6 |
| kw2_1225 | <i>rplJ</i> | ribosomal protein L10 RplJ              | 2.5 |
| kw2_2057 | <i>rplK</i> | ribosomal protein L11 RplK              | 2.4 |
| kw2_2335 | <i>rplM</i> | ribosomal protein L13 RplM              | 2.3 |
| kw2_2141 | <i>rplO</i> | ribosomal protein L15 RplO              | 2.4 |
| kw2_2159 | <i>rplW</i> | ribosomal protein L23 RplW              | 2.4 |

### Others

|          |             |                                                        |     |
|----------|-------------|--------------------------------------------------------|-----|
| kw2_0426 |             | sugar ABC transporter ATP-binding<br>protein           | 2.3 |
| kw2_0656 |             | ABC transporter ATP-binding/permease<br>protein        | 2.7 |
| kw2_1072 |             | cell surface protein                                   | 2.3 |
| kw2_1381 |             | basic membrane protein A                               | 2.3 |
| kw2_0534 |             | enoyl-(acyl carrier protein) reductase                 | 2.5 |
| kw2_0861 |             | FeS assembly SUF system protein                        | 2.3 |
| kw2_1842 | <i>sufB</i> | FeS assembly protein SufB                              | 2.3 |
| kw2_0839 | <i>mraW</i> | S-adenosyl-methyltransferase MraW                      | 2.6 |
| kw2_1319 | <i>pyk</i>  | pyruvate kinase Pyk                                    | 2.5 |
| kw2_0318 |             | ybaK/ebcC protein                                      | 2.5 |
| kw2_0472 |             | DegV family protein                                    | 2.5 |
| kw2_1145 |             | aldo/keto reductase family protein                     | 2.3 |
| kw2_1228 |             | HTH/peptidase S24 family domain-<br>containing protein | 2.3 |
| kw2_1984 |             | nitroreductase family protein                          | 2.8 |
| kw2_2173 |             | FMN-binding protein                                    | 2.3 |

|                              |                                |     |
|------------------------------|--------------------------------|-----|
| kw2_0880                     | glyoxalase family protein      | 2.5 |
| kw2_1964                     | PspC domain-containing protein | 3.9 |
| kw2_1965                     | PspC domain-containing protein | 4.6 |
| <b>Hypothetical proteins</b> |                                |     |
| kw2_0067                     | hypothetical protein           | 3.2 |
| kw2_0305                     | hypothetical protein           | 3.0 |
| kw2_0315                     | hypothetical protein           | 3.1 |
| kw2_0615                     | hypothetical protein           | 2.6 |
| kw2_0862                     | hypothetical protein           | 3.2 |
| kw2_0934                     | hypothetical protein           | 2.3 |
| kw2_0971                     | hypothetical protein           | 2.4 |
| kw2_1019                     | hypothetical protein           | 2.4 |
| kw2_1025                     | hypothetical protein           | 2.9 |
| kw2_1713                     | hypothetical protein           | 2.4 |
| kw2_1913                     | hypothetical protein           | 2.3 |
| kw2_1966                     | hypothetical protein           | 5.1 |
| kw2_2070                     | hypothetical protein           | 2.3 |

---

<sup>a</sup> Genes were considered as up-regulated when the calculated fold change (FC) was  $\geq 2.0$  with DESeq2, edgeR and DEXUS packages. The FC value is the mean of the FC obtained with the 3 packages. When the up-regulated genes were preceded by a predicted ComX-binding motif (Com-box), adjacent downstream genes with a calculated FC  $\geq 1.5$  with the 3 packages were also retained.

<sup>b</sup> Orthologous late *com* genes of *S. pneumoniae* shown as essential for DNA transformation (1); Y, presence.

<sup>c</sup> Predicted Com-box recognized by ComX (Table S3); Y, presence.

TABLE S3. Predicted Com-box in intergenic regions of the genome of KW2.

| Locus tag | Gene         | Description                                   | Up-regulated <sup>a</sup> | P value <sup>b</sup> | start <sup>c</sup> | Predicted Com-box <sup>d</sup> |
|-----------|--------------|-----------------------------------------------|---------------------------|----------------------|--------------------|--------------------------------|
| kw2_0357  | <i>recA</i>  | recombination protein A RecA                  | Y                         | 1.3E-07              | -78                | GTGACAAAGTTCATAAAAAAACGTATA    |
| kw2_0391  | <i>ssbB</i>  | single-strand binding protein SsbB            | Y                         | 1.1E-11              | -21                | GTGACAAATGCTCAAACTTTACGTATA    |
| kw2_0833  |              | hemolysin TlyA family protein                 |                           | 4.9E-08              | -16                | GATACATTTTTTAGAAAAATACGTATA    |
| kw2_1003  | <i>radC</i>  | DNA repair protein RadC                       | Y                         | 1.2E-11              | -7                 | GTGACAAACGAATGTGTTTTTCGTATA    |
| kw2_1034  | <i>comFA</i> | competence protein ComFA                      | Y                         | 1.6E-11              | -7                 | GTTACATTTGAACAGCATTTCCGTATA    |
| kw2_1192  | <i>dprA</i>  | DNA protecting protein DprA                   | Y                         | 2.8E-10              | -61                | GTTACAATTTAAATATTTTATCGTATA    |
| kw2_1577  |              | cell surface protein                          | Y                         | 5.7E-08              | -19                | GTTACAAAATCTCCTTTTTCGTATA      |
| kw2_1705  | <i>coiA</i>  | competence protein CoiA-like family           | Y                         | 6.8E-10              | -7                 | GTGACAAAATTATATTTTTCGTATA      |
| kw2_1751  | <i>comEA</i> | competence protein ComEA                      | Y                         | 1.1E-08              | -7                 | GAACTTTTCAAGAGTTTTCGTATA       |
| kw2_1863  | <i>recQ</i>  | ATP-dependent DNA helicase RecQ               |                           | 3.6E-06              | -11                | GTGATTTTTCCCTCTCTTTACGTATA     |
| kw2_2080  | <i>comC</i>  | type IV prepilin peptidase                    |                           | 6.0E-09              | -7                 | GTTACATTCAAAAICCATTTTCGTATA    |
| kw2_2122  | <i>radA</i>  | DNA repair protein RadA                       | Y                         | 1.3E-11              | -16                | GTTACATCTGAATAAATTTTACGTATA    |
| kw2_2185  | <i>comGA</i> | competence protein ComGA                      | Y                         | 4.6E-09              | -7                 | GTTACATTTACTAACAAATTCGTATA     |
| kw2_2244  | <i>recX</i>  | recombination regulator RecX                  | Y                         | 1.1E-08              | -10                | GTGACAAATTCCTAAGATTTTCGTATA    |
| kw2_2251  |              | 6-phosphogluconate dehydrogenase-like protein |                           | 1.1E-06              | -43                | TTGACAAATGAAAAAAATTCCTATA      |

<sup>a</sup> Up-regulated genes (Y) according to Table S2.

<sup>b</sup> P value < 1.0 E-06.

<sup>c</sup> Position of the start of the predicted Com-box relative to the first nucleotide of the start codon of the downstream gene.

<sup>d</sup> Predicted Com-boxes identified by MEME and MAST (<http://meme-suite.org/>) using as input the Com-boxes upstream of *comEA*, *comFA*, *comGA*, *dprA*, *coiA*, *ssbB*, *radA*, *radC*, and *recA*.

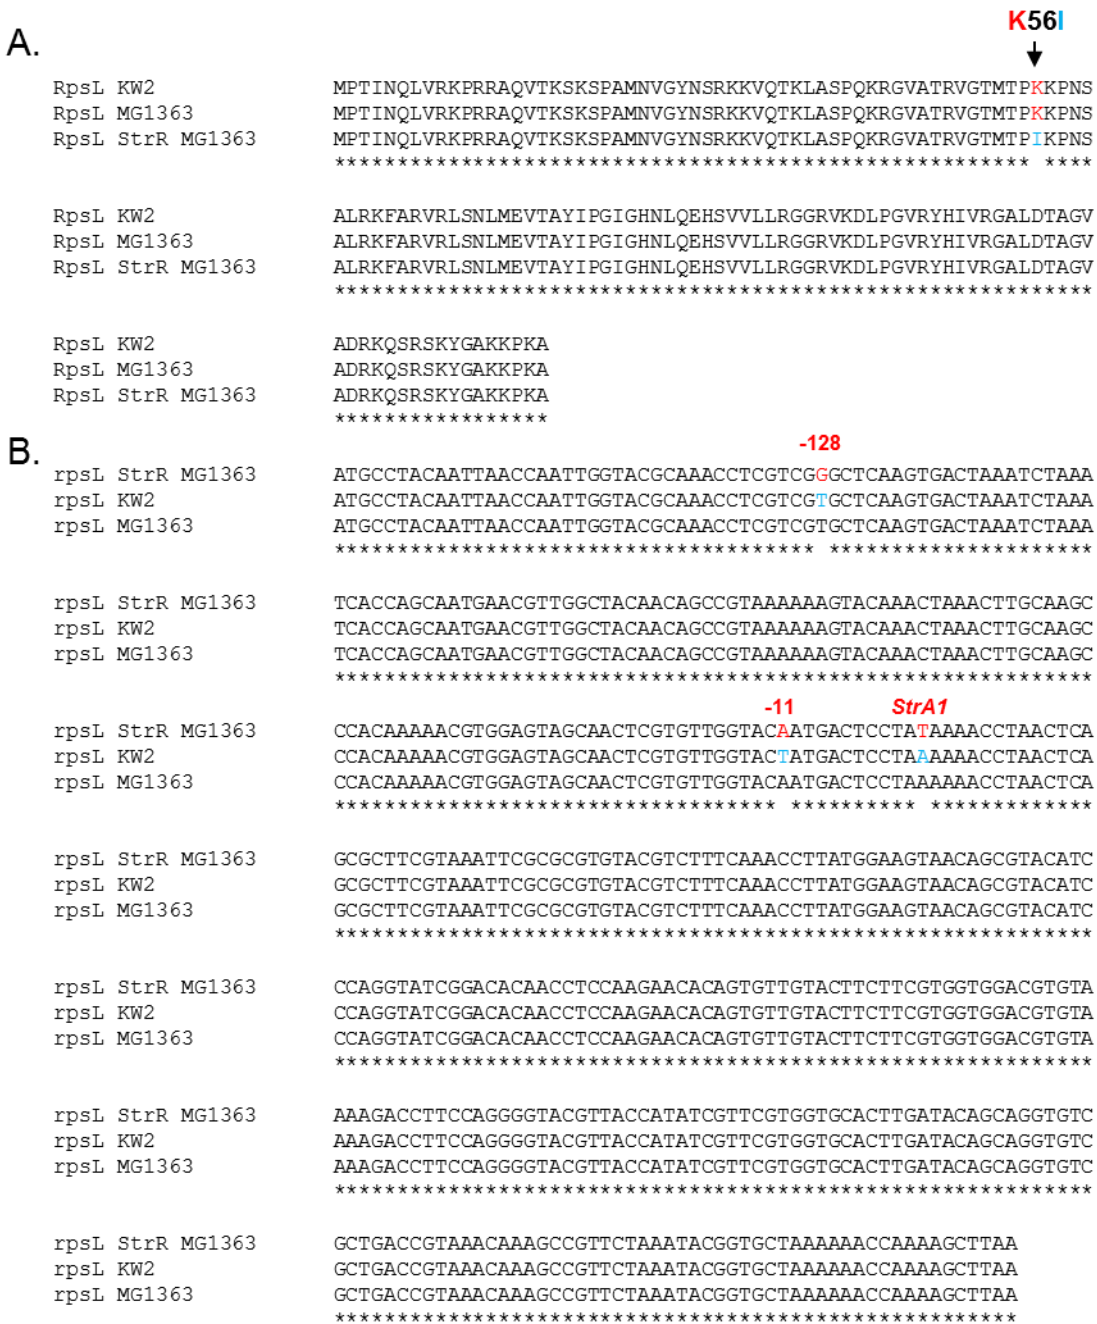

**FIG. S1.** Protein and nucleotide mutations of a selected spontaneous *Str<sup>r</sup>* mutant of MG1363. A. Alignment of ribosomal proteins S12 (RpsL) from KW2, MG1363 and the selected spontaneous *Str<sup>r</sup>* mutant of MG1363. The K56I mutation (*strA1* allele) is highlighted. B. Nucleotide alignment of *rpsL* ORFs from KW2, MG1363 and the selected spontaneous *Str<sup>r</sup>* mutant of MG1363. The three mutations (*strA1*, -11 and -128) in the nucleotide sequence of the mutated *rpsL* variant of MG1363 compared to *rpsL* of KW2 are highlighted.



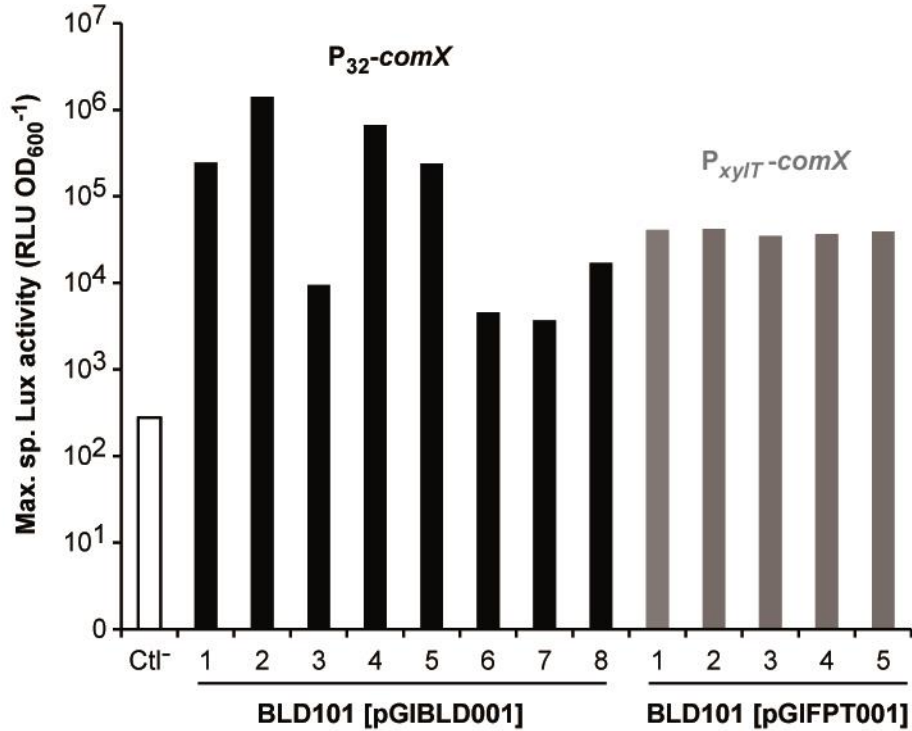

**FIG. S2.** Stabilization of the activation of the late promoter P<sub>comGA</sub> by inducible *comX* expression. Maximum specific luciferase (Lux) activity (RLU OD<sub>600</sub><sup>-1</sup>) emitted by 8 independent clones (clone 1 to 8) of BLD101 [pGIBLD001] (P<sub>32-comX</sub>) compared to 5 independent clones (clone 1 to 5) of BLD101 [pGIFPT001] (P<sub>xyIT-comX</sub>). Ctl<sup>-</sup>, control strain carrying the empty vector (BLD101 [pG<sup>+</sup>host9]). Cells of BLD101 [pGIBLD001] and BLD101 [pGIFPT001] were respectively grown in CDMG and M17X. Data were collected from Fig. 2A and 5B.

## REFERENCES

1. **Peterson, S. N., C. K. Sung, R. Cline, B. V. Desai, E. C. Snesrud, P. Luo, J. Walling, H. Li, M. Mintz, G. Tsegaye, P. C. Burr, Y. Do, S. Ahn, J. Gilbert, R. D. Fleischmann, and D. A. Morrison.** 2004. Identification of competence pheromone responsive genes in *Streptococcus pneumoniae* by use of DNA microarrays. *Mol. Microbiol.* 51:1051-1070.
